# Supplementary material
Source: PubMed Central journal article supplement (PMC2722289)
Supplement: 0813369106_0813369106SI.pdf [file 0813369106_0813369106SI.pdf]

# Supporting Information

Ge et al. 10.1073/pnas.0813369106

1 MDYKDDDDKHNPEPGKKPVSAFNKKPRSAEVTAGSAAVFEAETERSGVKVRWQRDGS DIT  
61 ANDKYGLAAEGKRHTLTVRDA SPDDQGSYAVIAGSSKVKFDLKVTEPAPPEKAESEVAPG  
121 APKEVPAPATELEESVSSPEGSSVSVTQDGSAAEHQGAPDDPIGLFLMRPQDGEVTVGGSI  
181 VFSARVAGASLLKPPVVKWFKGKWDLSKVKVQHLQLHDSYDRASKVYLFELHITDAQTT  
241 SAGGYRCEVSTKDKFDS CNFNLTVHEAIGSGDLLRS AFRRTSLAGAGRRTSDSHEDAGT  
301 LDFSSLLKKRDSFRRDSKLEAPAEEDVWEILRQAPPSEYERIAFQHGVTDLRGMLKRLKG  
361 MKQDEKKS TAFQKKLEPAYQVNKGHKIRLTVELADPDAEVKWLKNGQEIQMSGSKYIFES  
421 VGAKR TLTI SQCSLADDAAYQCVVGGKECSTELFVKEPPVLI TRSLEDQLVMVGQVEFE  
481 CEVSEEGAQVKWLDGVELTREE TFKYRFKKDGRKHHLIINEATLEDAGHYAVRTSGGQS  
541 LAELIVQEKLEVYQSIADLAVGAKDQAVFKCEVSDENVRGVWLKNGKELVPDNRIKVVSH  
601 IGRVHKL TIDDVTPADEADYSFVPEGFACNLSAKLHFMEVKIDFVPRQEP PKIHLDCPGS  
661 TPD TIVVAGNKLRLDVPISGDPAPT VVWQKT V TQGKKA STGPHDPAPEDAGADEEWVFD  
721 KKLCE TEGRVRVETTKDRSVFTVEGAKEDEGVYTVTVKNPVGEDQVNLTVKVIDVPA  
781 PAAPKI SNVGEDSCTVQWEPPAYDGGQPV LGYILERK KKS YRWMRLNFDLLRELSHEAR  
841 RMIEGVAYEMRVYAVNAVGM SRP SPASQPFMPI GPPGEP THLAVEDVSDTTVSLKWRPPE  
901 RVGAGGLDGY SVEYCQEGCSEWTPALQGLTERTSMLVKDLP T GARLLFRVRAHNVAGPGG  
961 PIVTKEPVTVQEI LQRPRQLPRHLRQT IQKKVGEPVNLLI PFQGKPRPQVTWTKEGQPL  
1021 AGEEV SIRNSPTD TILFIRAARRTHSGTYQVTVRIENMEDKATLILQIVDKPSP PQDIRI  
1081 VETWGFNVALEWKPPQDDGNTEIWGYTVQKADKKTMEWFTVLEHYRRTHCVVSELIIGNG  
1141 YYFRVFSHNMVGS SSKAAATKEPVFI PRPGIT YEPPKYKALDFSEAPSFTQPLANRSIIA  
1201 GYNAILCCA VRGS PKPKI SWFKNGLDLGEDARFRMFCKQGVLTLEIRKPCPYDGGVYVCR  
1261 ATNLQGEAQCECRLEVRVPQ

| Domains             | Amino acid residues | Domains | Amino acid residues |
|---------------------|---------------------|---------|---------------------|
| Flag                | 1 - 10              | C5      | 655 - 777           |
| C0                  | 11 - 104            | Linker  | 778 - 780           |
| Pro-Ala-rich linker | 105 - 160           | C6      | 781 - 874           |
| C1                  | 161 - 263           | Linker  | 875                 |
| MyBP-C Motif        | 264 - 364           | C7      | 876 - 973           |
| C2                  | 365 - 455           | Linker  | 974 - 975           |
| Linker              | 456 - 457           | C8      | 976 - 1069          |
| C3                  | 458 - 546           | Linker  | 1070                |
| Linker              | 547 - 548           | C9      | 1071 - 1166         |
| C4                  | 549 - 642           | Linker  | 1167 - 1183         |
| Linker              | 643 - 654           | C10     | 1184 - 1280         |

**Fig. S1.** Full-length recombinant cMyBP-C amino acid sequence and corresponding domain structure. Ser (S) and Thr (T) residues are highlighted in RED. S283, S292, and S312 in recombinant cMyBP-C correspond to the three potential phosphorylation sites in endogenous mouse cMyBP-C, S273, S282, and S302.









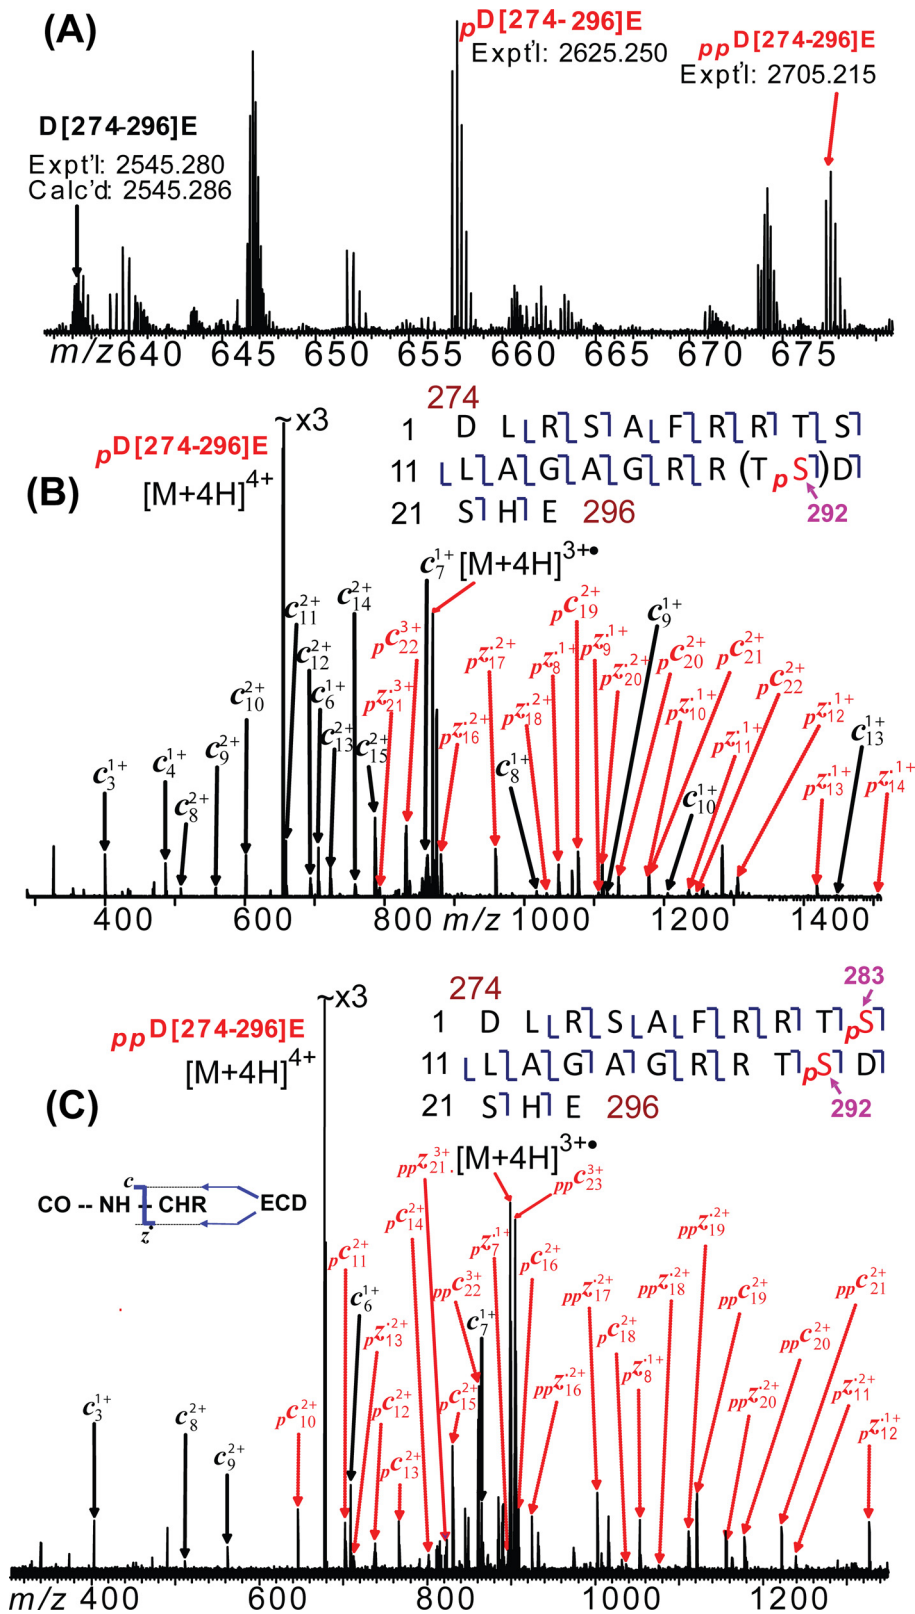

**Fig. S6.** Identification of Ser-283 and Ser-292 as phosphorylation sites from limited Asp-N proteolysis of full-length cMyBP-C. (A) Partial ESI/FTMS spectrum showing peptide D[274–296]E is mono- and bis-phosphorylated. (B) ECD of monophosphorylated D[274–296]E (pD[274–296]E) locates a phosphorylation site to Thr-291/Ser-292. (C) ECD of bisphosphorylated D[274–296]E (ppD[274–296]E) locates two phosphorylated sites to Ser-283 and Ser-292. The identified phosphorylation sites and the phosphorylated *c/z*\* fragmentation ions are labeled with a “p.”



**Table S1. Peptide assignments from limited Asp-N/Glu-C/Lys-C proteolysis of truncated cMyBP-C, C0-C4, expressed in baculovirus for localization of phosphorylation sites**

| Peptide mass           | Assignment  | Error, Da | Mono-P | Bis-P |
|------------------------|-------------|-----------|--------|-------|
| 3484.689 <sup>a</sup>  | M[1–30]E    | 0.021     | ND     | ND    |
| 4417.166 <sup>a</sup>  | M[1–40]E    | 0.038     | ND     | ND    |
| 12613.350 <sup>a</sup> | M[1–116]E   | 0.106     | ND     | ND    |
| 5520.766 <sup>b</sup>  | D[5–54]R    | –0.022    | ND     | ND    |
| 5779.842 <sup>b</sup>  | D[5–57]S    | –0.027    | ND     | ND    |
| 6294.156 <sup>b</sup>  | D[5–62]N    | 0.049     | ND     | ND    |
| 8190.203 <sup>b</sup>  | D[5–79]R    | 0.063     | ND     | ND    |
| 5175.687 <sup>b</sup>  | D[8–54]R    | –0.021    | ND     | ND    |
| 2576.309 <sup>c</sup>  | K[25–49]K   | –0.010    | ND     | ND    |
| 2891.484 <sup>a</sup>  | R[45–70]E   | 0.021     | ND     | ND    |
| 3172.538 <sup>a</sup>  | G[56–85]D   | 0.000     | ND     | ND    |
| 3304.703 <sup>a</sup>  | G[71–101]D  | 0.023     | ND     | ND    |
| 4366.286 <sup>a</sup>  | G[71–111]E  | 0.031     | ND     | ND    |
| 4694.466 <sup>a</sup>  | G[71–114]E  | 0.036     | ND     | ND    |
| 4910.543 <sup>a</sup>  | G[71–116]E  | 0.039     | ND     | ND    |
| 2630.295 <sup>c</sup>  | R[73–97]K   | –0.010    | ND     | ND    |
| 2141.019 <sup>b</sup>  | D[80–100]F  | –0.008    | ND     | ND    |
| 3530.811 <sup>a</sup>  | A[81–114]E  | 0.033     | ND     | ND    |
| 3746.878 <sup>a</sup>  | A[81–116]E  | 0.036     | ND     | ND    |
| 4769.431 <sup>b</sup>  | D[101–147]Q | 0.065     | ND     | ND    |
| 3409.585 <sup>a</sup>  | L[102–134]E | –0.165    | ND     | ND    |
| 13585.967 <sup>b</sup> | D[148–273]L | –0.195    | ND     | ND    |
| 2192.049 <sup>a</sup>  | H[154–173]E | 0.017     | ND     | ND    |
| 12565.621 <sup>b</sup> | D[159–273]L | –0.275    | ND     | ND    |
| 3158.618 <sup>a</sup>  | A[267–296]E | 0.025     | D      | ND    |
| 4805.486 <sup>a</sup>  | A[267–311]D | 0.031     | D      | ND    |
| 2077.117 <sup>b</sup>  | D[274–292]S | –0.008    | D      | ND    |
| 4738.476 <sup>b</sup>  | D[274–315]R | 0.025     | D      | D     |
| 3694.891 <sup>a</sup>  | A[298–329]E | 0.033     | D      | ND    |
| 3909.958 <sup>b</sup>  | D[316–349]T | 0.041     | ND     | ND    |
| 5564.912 <sup>b</sup>  | D[316–363]Q | 0.046     | ND     | ND    |
| 2840.451 <sup>b</sup>  | D[326–349]T | 0.027     | ND     | ND    |
| 4495.407 <sup>b</sup>  | D[326–363]Q | 0.034     | ND     | ND    |
| 2926.592 <sup>a</sup>  | R[341–365]E | 0.018     | ND     | ND    |
| 3568.958 <sup>b</sup>  | D[364–394]A | –0.015    | ND     | ND    |
| 11556.063 <sup>b</sup> | D[364–467]E | –0.107    | ND     | ND    |
| 3140.801 <sup>a</sup>  | K[366–392]E | 0.025     | ND     | ND    |
| 13927.12 <sup>c</sup>  | K[367–491]K | –0.030    | D      | ND    |
| 3188.653 <sup>b</sup>  | D[468–494]K | 0.024     | D      | ND    |
| 2145.113 <sup>b</sup>  | D[495–511]K | –0.009    | ND     | ND    |
| 3872.066 <sup>b</sup>  | D[495–526]E | 0.033     | ND     | ND    |
| 2429.359 <sup>a</sup>  | T[504–522]E | 0.015     | ND     | ND    |
| 3698.885 <sup>c</sup>  | H[516–549]K | –0.016    | ND     | ND    |
| 3459.832 <sup>b</sup>  | D[527–558]A | 0.032     | ND     | ND    |
| 2254.149 <sup>a</sup>  | V[553–573]E | 0.020     | ND     | ND    |
| 4517.493 <sup>b</sup>  | D[576–615]A | 0.032     | ND     | ND    |
| 4832.606 <sup>b</sup>  | D[576–618]A | 0.038     | ND     | ND    |
| 3136.720 <sup>a</sup>  | L[590–617]E | 0.018     | ND     | ND    |
| 4045.124 <sup>a</sup>  | L[590–625]E | 0.034     | ND     | ND    |
| 2100.182 <sup>b</sup>  | D[593–610]D | –0.009    | ND     | ND    |
| 3059.470 <sup>b</sup>  | D[616–642]I | 0.029     | ND     | ND    |
| 2744.358 <sup>b</sup>  | D[619–642]I | 0.024     | ND     | ND    |
| 9902.465 <sup>c</sup>  | L[635–641]K | –0.004    | ND     | ND    |
| 1015.548 <sup>c</sup>  | L[635–642]I | –0.004    | ND     | ND    |

Peptide masses listed here are monoisotopic masses. Superscript a, b, and c denote Glu-C, Asp-N, and Lys-C proteolysis, respectively. "Mono-P" and "bis-P" stand for mono- and bis-phosphorylated forms. "ND" is short for "not detected" and "D" is for "detected".



**Table S2. Peptide assignments from Asp-N/Glu-C/Lys-C proteolysis of full-length cMyBP-C (C0-C10) expressed in baculovirus for localization of phosphorylation sites**

| Peptide mass           | Assignment  | Error, Da | Mono-P | Bis-P |
|------------------------|-------------|-----------|--------|-------|
| 6100.021 <sup>b</sup>  | M[1–54]R    | –0.003    | ND     | ND    |
| 8769.365 <sup>b</sup>  | M[1–79]R    | –0.012    | ND     | ND    |
| 15741.56 <sup>b</sup>  | M[1–147]Q   | +0.081    | ND     | ND    |
| 6700.272 <sup>b</sup>  | D[2–62]N    | –0.020    | ND     | ND    |
| 6294.096 <sup>b</sup>  | D[5–62]N    | –0.011    | ND     | ND    |
| 15064.530 <sup>b</sup> | D[5–147]Q   | 0.024     | ND     | ND    |
| 15740.770 <sup>b</sup> | D[8–158]P   | –0.087    | ND     | ND    |
| 2576.322 <sup>c</sup>  | K[25–49]K   | 0.003     | ND     | ND    |
| 3121.541 <sup>a</sup>  | T[43–70]E   | –0.013    | ND     | ND    |
| 2159.074 <sup>a</sup>  | R[45–63]D   | –0.009    | ND     | ND    |
| 2891.451 <sup>a</sup>  | R[45–70]E   | –0.012    | ND     | ND    |
| 4037.056 <sup>b</sup>  | D[63–100]F  | –0.003    | ND     | ND    |
| 3304.666 <sup>a</sup>  | G[71–101]D  | –0.014    | ND     | ND    |
| 4910.483 <sup>a</sup>  | G[71–116]E  | –0.021    | ND     | ND    |
| 2630.300 <sup>c</sup>  | R[73–97]K   | –0.005    | ND     | ND    |
| 2141.025 <sup>b</sup>  | D[80–100]F  | –0.002    | ND     | ND    |
| 4769.359 <sup>b</sup>  | D[101–147]Q | –0.007    | ND     | ND    |
| 5789.784 <sup>b</sup>  | D[101–158]P | –0.008    | ND     | ND    |
| 1803.918 <sup>a</sup>  | V[117–134]E | –0.007    | ND     | ND    |
| 7565.825 <sup>c</sup>  | E[124–198]K | 0.010     | ND     | ND    |
| 2421.246 <sup>b</sup>  | D[148–170]Q | 0.108     | ND     | ND    |
| 7529.985 <sup>b</sup>  | D[148–218]H | 0.039     | ND     | ND    |
| 13357.750 <sup>b</sup> | D[148–271]G | 0.089     | ND     | ND    |
| 13585.786 <sup>b</sup> | D[148–273]L | 0.008     | ND     | ND    |
| 12337.075 <sup>b</sup> | D[159–271]G | –0.201    | ND     | ND    |
| 12565.580 <sup>b</sup> | D[159–273]L | 0.234     | ND     | ND    |
| 1852.920 <sup>c</sup>  | V[211–226]K | 0.002     | ND     | ND    |
| 3810.813 <sup>b</sup>  | D[219–252]K | –0.003    | ND     | ND    |
| 1690.903 <sup>b</sup>  | D[222–235]T | –0.001    | ND     | ND    |
| 3835.884 <sup>b</sup>  | D[222–255]F | 0.000     | ND     | ND    |
| 1821.824 <sup>a</sup>  | L[232–248]E | –0.007    | ND     | ND    |
| 2162.987 <sup>b</sup>  | D[236–255]F | –0.003    | ND     | ND    |
| 2082.958 <sup>a</sup>  | V[249–266]E | –0.010    | ND     | ND    |
| 3230.610 <sup>b</sup>  | D[272–301]L | –0.004    | D      | D     |
| 2545.280 <sup>b</sup>  | D[274–296]E | –0.006    | D      | D     |
| 3002.500 <sup>b</sup>  | D[274–301]L | –0.003    | D      | D     |
| 4077.117 <sup>b</sup>  | D[274–310]S | –0.004    | D      | D     |
| 4738.444 <sup>b*</sup> | D[274–315]R | –0.006    | D      | D     |
| 2018.005 <sup>b</sup>  | D[293–310]R | –0.002    | ND     | ND    |
| 2211.174 <sup>b</sup>  | D[297–315]R | –0.002    | D      | ND    |
| 1092.628 <sup>b</sup>  | D[302–310]R | –0.001    | ND     | ND    |
| 1753.957 <sup>b</sup>  | D[302–315]R | –0.002    | D      | ND    |
| 5668.903 <sup>c</sup>  | K[309–356]K | 0.007     | D      | ND    |
| 1087.502 <sup>b</sup>  | D[316–325]E | –0.001    | ND     | ND    |
| 5564.857 <sup>b</sup>  | D[316–363]Q | –0.009    | ND     | ND    |
| 4393.222 <sup>c</sup>  | L[319–356]K | 0.006     | ND     | ND    |
| 4495.373 <sup>b</sup>  | D[326–363]Q | 0.000     | ND     | ND    |
| 1672.958 <sup>b</sup>  | D[350–363]Q | –0.001    | ND     | ND    |
| 21969.250 <sup>b</sup> | D[364–558]A | –0.043    | ND     | ND    |
| 22123.540 <sup>c</sup> | S[368–565]K | 0.137     | ND     | ND    |
| 1301.630 <sup>a</sup>  | I[409–419]E | –0.003    | ND     | ND    |
| 1012.519 <sup>c</sup>  | Y[416–424]K | –0.004    | ND     | ND    |
| 3380.607 <sup>b</sup>  | D[437–467]E | –0.092    | ND     | ND    |
| 5774.776 <sup>c</sup>  | E[457–506]K | –0.141    | ND     | ND    |
| 2958.552 <sup>a</sup>  | T[504–527]D | –0.032    | ND     | ND    |
| 3698.907 <sup>c</sup>  | H[516–549]K | 0.006     | ND     | ND    |
| 1717.794 <sup>a</sup>  | D[527–543]E | –0.008    | ND     | ND    |
| 3574.648 <sup>a</sup>  | D[527–559]D | –0.178    | ND     | ND    |
| 1778.885 <sup>b</sup>  | D[559–574]S | –0.002    | ND     | ND    |
| 1828.935 <sup>a</sup>  | V[574–589]E | –0.008    | ND     | ND    |
| 1952.046 <sup>b</sup>  | D[576–592]P | –0.002    | ND     | ND    |
| 4517.457 <sup>b</sup>  | D[576–615]A | –0.004    | ND     | ND    |
| 4832.564 <sup>b</sup>  | D[576–618]A | –0.004    | ND     | ND    |

| Peptide mass           | Assignment        | Error, Da | Mono-P | Bis-P |
|------------------------|-------------------|-----------|--------|-------|
| 15763.74 <sup>b</sup>  | D[576–719]F       | 0.070     | ND     | ND    |
| 4615.421 <sup>b</sup>  | D[616–655]L       | 0.134     | ND     | ND    |
| 2054.081 <sup>b</sup>  | D[656–675]L       | –0.002    | ND     | ND    |
| 2090.155 <sup>c</sup>  | L[673–691]K       | 0.003     | ND     | ND    |
| 3097.616 <sup>b</sup>  | D[676–705]P       | –0.003    | ND     | ND    |
| 3509.774 <sup>b</sup>  | D[676–709]E       | –0.005    | ND     | ND    |
| 3823.893 <sup>b</sup>  | D[676–713]A       | –0.008    | ND     | ND    |
| 2941.491 <sup>b</sup>  | D[682–709]E       | –0.002    | ND     | ND    |
| 3255.615 <sup>b</sup>  | D[682–713]A       | –0.001    | ND     | ND    |
| 4060.934 <sup>b</sup>  | D[682–719]F       | –0.010    | ND     | ND    |
| 2568.130 <sup>c</sup>  | K[698–721]K       | –0.010    | ND     | ND    |
| 2440.048 <sup>c</sup>  | A[699–721]K       | 0.003     | ND     | ND    |
| 2104.129 <sup>b</sup>  | D[720–737]K       | –0.002    | ND     | ND    |
| 3551.822 <sup>b</sup>  | D[720–750]E       | –0.033    | ND     | ND    |
| 12349.901 <sup>b</sup> | D[720–829]F       | –0.418    | ND     | ND    |
| 1238.604 <sup>c</sup>  | E[750–760]K       | 0.001     | ND     | ND    |
| 1605.786 <sup>b</sup>  | D[751–765]E       | –0.003    | ND     | ND    |
| 1411.732 <sup>c</sup>  | N[761–773]K       | 0.001     | ND     | ND    |
| 1438.758 <sup>a</sup>  | Q[767–779]D       | –0.045    | ND     | ND    |
| 2644.235 <sup>b</sup>  | D[779–803]Y       | 0.023     | ND     | ND    |
| 3647.772 <sup>c</sup>  | I[786–818]K       | –0.002    | ND     | ND    |
| 3181.436 <sup>b</sup>  | D[804–829]F       | –0.297    | ND     | ND    |
| 8457.276 <sup>c</sup>  | S[821–895]K       | 0.059     | ND     | ND    |
| 4755.246 <sup>c</sup>  | W[896–938]K       | –0.006    | ND     | ND    |
| 4409.430 <sup>a</sup>  | R[932–972]E       | –0.018    | ND     | ND    |
| 2811.602 <sup>c</sup>  | D[939–965]K       | 0.004     | ND     | ND    |
| 3175.845 <sup>c</sup>  | E[966–991]K       | 0.003     | ND     | ND    |
| 2731.564 <sup>c</sup>  | K[992–1015]K      | 0.011     | ND     | ND    |
| 5184.647 <sup>c</sup>  | E[1016–1061]K     | 0.010     | ND     | ND    |
| 10771.510 <sup>c</sup> | E[1016–1110]K     | –0.010    | ND     | ND    |
| 17222.593 <sup>a</sup> | I[1078–1229]E     | –0.030    | ND     | ND    |
| 14726.410 <sup>a</sup> | G[1099–1229]E     | –0.048    | ND     | ND    |
| 3939.892 <sup>a</sup>  | I[1103–1134]E     | –0.063    | ND     | ND    |
| 2130.143 <sup>c</sup>  | E[1162–1179]K     | –0.008    | ND     | ND    |
| 11007.56 <sup>b</sup>  | D[1182–<br>1280]Q | 0.078     | ND     | ND    |
| 2770.358 <sup>b</sup>  | D[1230–1252]Y     | –0.065    | ND     | ND    |
| 1465.663 <sup>a</sup>  | G[1254–1267]E     | –0.035    | ND     | ND    |
| 2977.569 <sup>a</sup>  | G[1254–<br>1280]Q | –0.137    | ND     | ND    |

Peptide masses listed here are monoisotopic masses. <sup>a</sup>, <sup>b</sup>, <sup>c</sup>, <sup>d</sup> denote Glu-C, Asp-N, and Lys-C proteolysis respectively. "Mono-P" and "bis-P" stand for mono- and bis-phosphorylated forms. "ND" is short for "not detected" and "D" is for "detected".

\*Mono, bis- and Tris-phosphorylations were detected.
